# Supplementary material for: Genomic evidence of two-staged transmission of the early seventh cholera pandemic
Source: PubMed Central journal article supplement — Nat Commun. 2024 Oct 1;15:8504. doi: 10.1038/s41467-024-52800-w (PMC11445481; doi:10.1038/s41467-024-52800-w), 2024-10-01
Supplement: 41467_2024_52800_MOESM3_ESM.pdf [file 41467_2024_52800_MOESM3_ESM.pdf]

## **Description of Additional Supplementary Files**

Supplementary Data 1. SNPs identified in 28 complete genomes

Supplementary Data 2. Genes in each category

Supplementary Data 3. Genes with multiple SNPs identified

Supplementary Data 4. SNPs allocated on branch 8

Supplementary Data 5. Gene duplications in complete genomes

Supplementary Data 6. Proteins annotated in superintegrons

Supplementary Data 7. Superintegrons extracted from 25 genomes

Supplementary Data 8. Two insertion regions on superintegrons

Supplementary Data 9. Comparison of genome sequences of CRC1106 and M806

Supplementary Data 10. Publicly available genomes used in this study

Supplementary Data 11. Correspondence of two annotations
